# Supplementary material for: A bacterial assay for rapid screening of IAA catabolic enzymes
Source: PubMed Central journal article supplement (PMC6827244; doi:10.1186/s13007-019-0509-6), 2019-11-04
Supplement: 13007_2019_509_MOESM2_ESM.pdf [file 13007_2019_509_MOESM2_ESM.pdf]

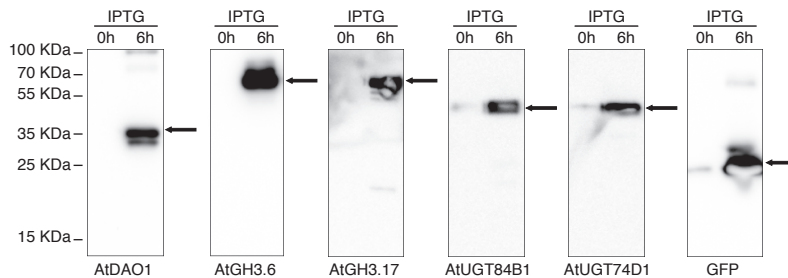

**Figure S1.** Western blot analysis of IPTG-induced *E. coli* harboring recombinant AtDAO1, AtGH3.6, AtGH3.17, AtUGT84B1, AtUGT74D1 or GFP construct. Bacterial cultures were treated with 0.1 mM IPTG and incubated 6 hours at 20°C. For bacterial enzymatic assays, recombinant protein expression was obtained with over-night incubation at 20°C in the presence of 0.1 mM IPTG. Calculated MW of recombinant proteins: 35.7 kDa (AtDAO1), 69.9 kDa (AtGH3.6 and AtGH3.17), 51.7 kDa (AtUGT84B1), 51.1 kDa (AtUGT74D1) and 27 kDa (GFP).
