# Supplementary material for: A bacterial assay for rapid screening of IAA catabolic enzymes
Source: PubMed Central journal article supplement (PMC6827244; doi:10.1186/s13007-019-0509-6), 2019-11-04
Supplement: 13007_2019_509_MOESM4_ESM.pdf [file 13007_2019_509_MOESM4_ESM.pdf]

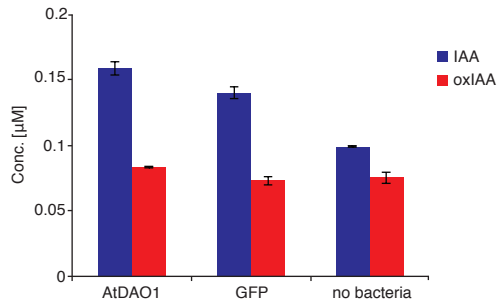

**Figure S2.** Analysis of IAA and oxIAA background concentrations in liquid media containing AtDAO1- or GFP-producing bacteria or no bacteria prior supplementation with exogenous IAA (T0). Mean  $\pm$  SD ( $n=3$ ).
